# Supplementary material for: The underlying molecular mechanism and drugs for treatment in adrenal cortical carcinoma
Source: PubMed Central journal article supplement (PMC8241782; doi:10.7150/ijms.60261), 2021-06-16
Supplement: ijmsv18p3026s1.pdf [file ijmsv18p3026s1.pdf]

# supplementary file 1

| SUID | MCODE_Cluster | MCODE_Node_Status | MCODE_Score | name   |
|------|---------------|-------------------|-------------|--------|
| 81   | Cluster 3     | Clustered         | 8           | FGA    |
| 84   | Cluster 2     | Clustered         | 16          | F2     |
| 92   | Cluster 1     | Clustered         | 26          | CXCL8  |
| 93   | Cluster 1     | Clustered         | 26          | CXCR1  |
| 101  | Cluster 5     | Clustered         | 5           | COL3A1 |
| 102  | Cluster 5     | Clustered         | 5           | COL1A1 |
| 104  | Cluster 2     | Clustered         | 16          | UTS2R  |
| 105  | Cluster 2     | Clustered         | 16          | UTS2   |
| 123  | Cluster 3     | Clustered         | 8           | ALB    |
| 124  | Cluster 3     | Clustered         | 8           | APOA1  |
| 127  | Cluster 1     | Clustered         | 26          | CXCL6  |
| 133  | Cluster 1     | Clustered         | 26          | CXCL1  |
| 134  | Cluster 1     | Clustered         | 26          | CCL20  |
| 144  | Cluster 1     | Clustered         | 26          | CXCL11 |
| 146  | Cluster 2     | Clustered         | 16          | TRH    |
| 147  | Cluster 2     | Clustered         | 16          | OXT    |
| 149  | Cluster 3     | Clustered         | 8           | IL6    |
| 154  | Cluster 5     | Clustered         | 5           | COL6A3 |
| 163  | Cluster 1     | Clustered         | 26          | CXCL5  |
| 165  | Cluster 2     | Clustered         | 16          | F2RL2  |
| 183  | Cluster 3     | Clustered         | 8           | CP     |
| 191  | Cluster 1     | Clustered         | 26          | CXCL3  |
| 202  | Cluster 3     | Clustered         | 8           | AFP    |
| 204  | Cluster 3     | Clustered         | 7           | HP     |
| 223  | Cluster 1     | Clustered         | 26          | C3     |
| 225  | Cluster 1     | Clustered         | 26          | FPR2   |
| 264  | Cluster 3     | Clustered         | 7           | DEFA4  |
| 265  | Cluster 3     | Clustered         | 7           | LTF    |
| 276  | Cluster 3     | Clustered         | 7           | TCN1   |
| 287  | Cluster 1     | Clustered         | 26          | ADCY5  |
| 288  | Cluster 1     | Clustered         | 26          | DRD2   |
| 302  | Cluster 4     | Clustered         | 10          | DRD5   |
| 305  | Cluster 3     | Clustered         | 7           | OLFM4  |
| 307  | Cluster 1     | Clustered         | 26          | CX3CR1 |
| 333  | Cluster 1     | Clustered         | 26          | GNG8   |
| 334  | Cluster 1     | Clustered         | 26          | GNGT1  |
| 339  | Cluster 1     | Clustered         | 26          | GNAT3  |
| 349  | Cluster 1     | Clustered         | 26          | PTGER3 |
| 374  | Cluster 3     | Clustered         | 7           | SLPI   |
| 376  | Cluster 2     | Clustered         | 16          | HTR2C  |
| 378  | Cluster 1     | Clustered         | 26          | NMU    |
| 380  | Cluster 1     | Clustered         | 26          | GRM8   |

|     |           |           |    |         |
|-----|-----------|-----------|----|---------|
| 388 | Cluster 1 | Clustered | 26 | PPY     |
| 389 | Cluster 1 | Clustered | 26 | SSTR1   |
| 391 | Cluster 5 | Clustered | 5  | COL14A1 |
| 396 | Cluster 3 | Clustered | 7  | PTX3    |
| 403 | Cluster 2 | Clustered | 16 | GCGR    |
| 404 | Cluster 4 | Clustered | 10 | IAPP    |
| 426 | Cluster 5 | Clustered | 5  | COL11A1 |
| 430 | Cluster 1 | Clustered | 26 | CASR    |
| 437 | Cluster 1 | Clustered | 26 | OPRD1   |
| 442 | Cluster 1 | Clustered | 26 | HTR1D   |
| 443 | Cluster 1 | Clustered | 26 | HTR1B   |
| 468 | Cluster 2 | Clustered | 16 | EDN3    |
| 469 | Cluster 2 | Clustered | 16 | PROK1   |
| 493 | Cluster 5 | Clustered | 5  | COL4A6  |
| 503 | Cluster 1 | Clustered | 26 | HCAR2   |
| 509 | Cluster 4 | Clustered | 10 | VIPR2   |
| 544 | Cluster 4 | Clustered | 10 | MC3R    |
| 546 | Cluster 2 | Clustered | 16 | HTR2B   |
| 570 | Cluster 4 | Clustered | 10 | PTGER2  |
| 576 | Cluster 4 | Clustered | 10 | SCTR    |
| 578 | Cluster 1 | Seed      | 26 | SUCNR1  |
| 595 | Cluster 3 | Clustered | 8  | ENAM    |
| 612 | Cluster 4 | Seed      | 10 | PTGDR   |
| 647 | Cluster 2 | Seed      | 16 | OPN4    |
| 726 | Cluster 3 | Seed      | 8  | SCG2    |

**Supplementary file 2. P-value of OS and DFS for the 22 hub-genes.**

| <b>Genes</b>  | <b>OS (P-value)</b> | <b>DFS (P-value)</b> |
|---------------|---------------------|----------------------|
| <b>C3</b>     | 0.02                | 0.041                |
| <b>PTGER3</b> | 0.042               | 0.2                  |
| <b>GRM8</b>   | 0.044               | 0.36                 |
| <b>HTR1B</b>  | 0.33                | 0.41                 |
| <b>CX3CR1</b> | 0.036               | 0.021                |
| <b>SUCNR1</b> | 0.046               | 0.075                |
| <b>SSTR1</b>  | 0.018               | 0.04                 |
| <b>OPRD1</b>  | 0.89                | 0.86                 |
| <b>CXCL5</b>  | 0.13                | 0.32                 |
| <b>CXCR1</b>  | 0.68                | 0.29                 |
| <b>CXCL11</b> | 0.62                | 0.66                 |
| <b>FPR2</b>   | 0.73                | 0.34                 |
| <b>CXCL1</b>  | 0.7                 | 0.66                 |
| <b>GNGT1</b>  | 0.012               | 0.016                |
| <b>CXCL8</b>  | 0.005               | 0.032                |
| <b>GNAT3</b>  | 0.047               | 0.2                  |
| <b>CXCL6</b>  | 0.28                | 0.67                 |
| <b>CXCL3</b>  | 0.074               | 0.32                 |
| <b>PPY</b>    | 0.013               | 0.083                |
| <b>HCAR2</b>  | 0.009               | 0.012                |
| <b>DRD2</b>   | 0.19                | 0.3                  |
| <b>HTR1D</b>  | 0.38                | 0.005                |

OS= overall survival; DFS=disease-free survival.

**Supplementary file 3. characteristics of the patients for miRNAs.**

| Parameter   | Alive (51)  | Dead (28)   | P                       |
|-------------|-------------|-------------|-------------------------|
| Age (years) | 45.96±15.21 | 48.95±15.81 | 0.37                    |
| Gender      |             |             | 0.759( $\chi^2=0.094$ ) |
| Female      | 31          | 18          |                         |
| Male        | 20          | 11          |                         |
| Stage       |             |             | 0.03( $\chi^2=10.749$ ) |
| T1          | 7(13.7%)    | 2(7.1%)     |                         |
| T2          | 32(62.8%)   | 10(35.7%)   |                         |
| T3          | 5(9.8%)     | 5(17.9%)    |                         |
| T4          | 7(13.7%)    | 11(39.3%)   |                         |
| Lymph node  |             |             | 0.514( $\chi^2=1.33$ )  |
| N0          | 44(86.3%)   | 26(92.9%)   |                         |
| N1          | 7(13.7%)    | 2(7.1%)     |                         |
| Metastasis  |             |             | 0.099( $\chi^2=4.617$ ) |
| M0          | 44(86.3%)   | 20(71.4%)   |                         |
| M1          | 7(13.7%)    | 8(28.6%)    |                         |
